# Supplementary material
Source: PubMed Central journal article supplement (PMC7954606)
Supplement: jci-131-143557-s107.pdf [file jci-131-143557-s107.pdf]

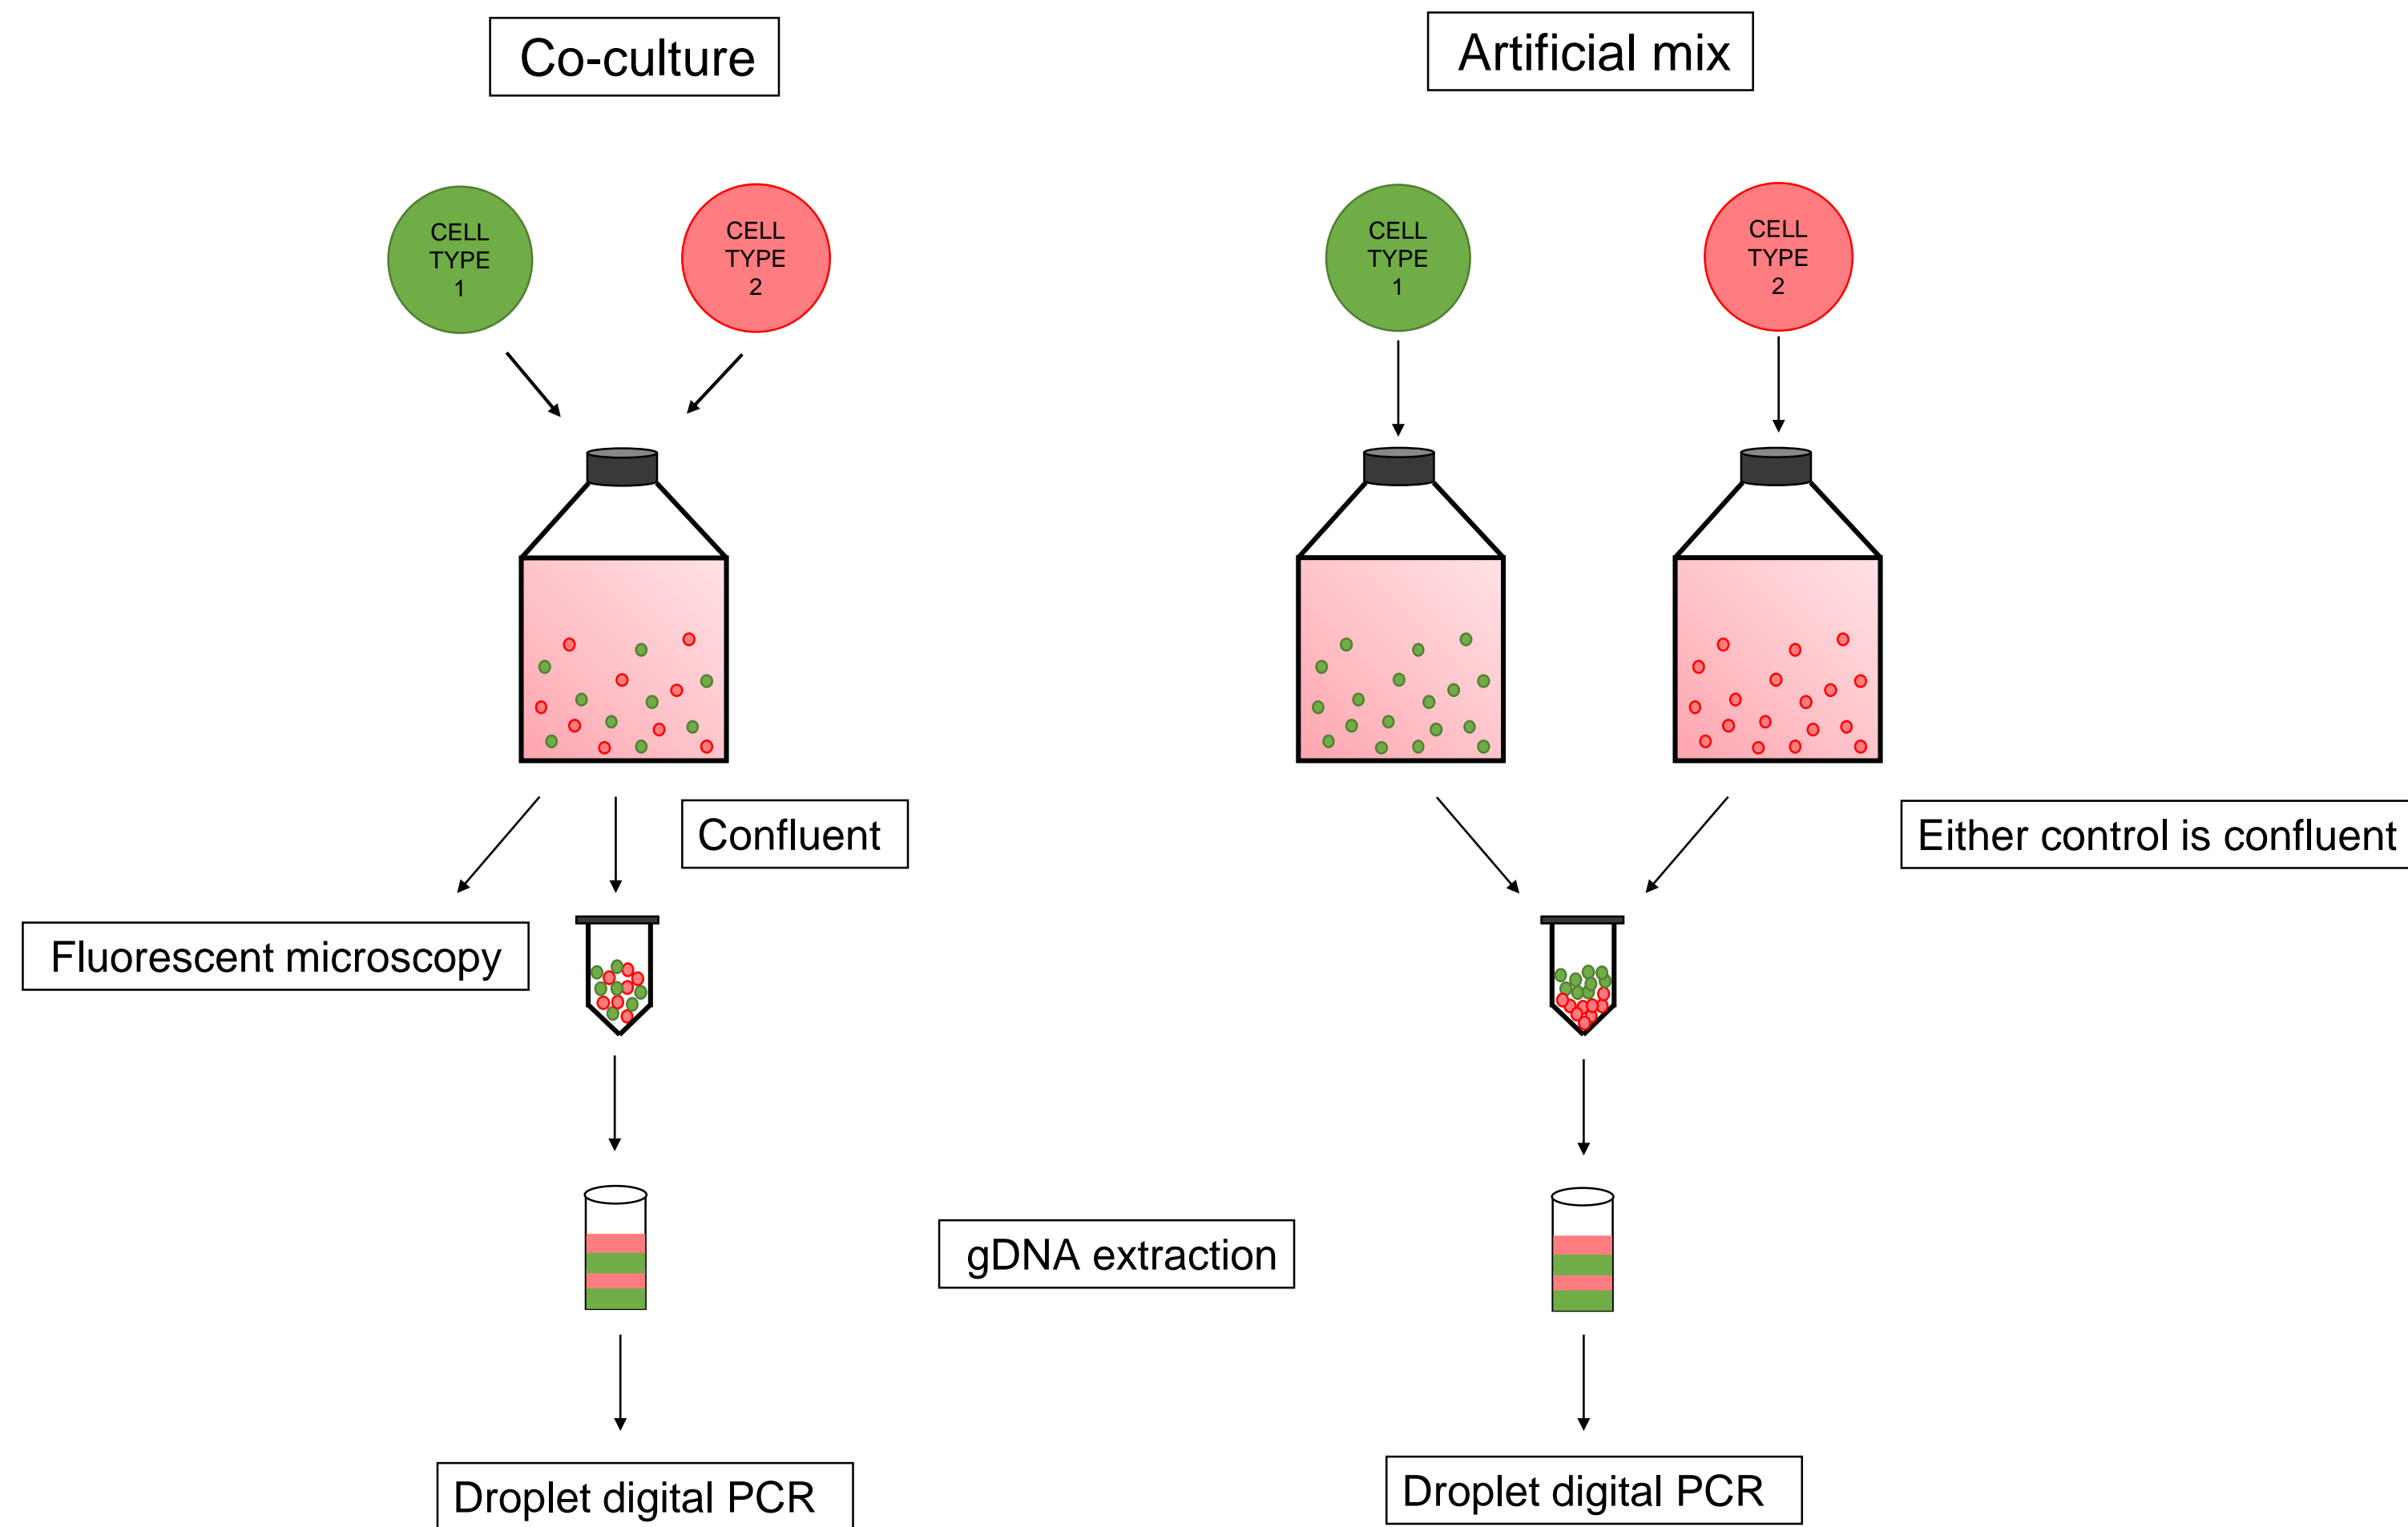

**Supplementary Fig. S1: Experimental set up and workflow for co-cultures**

Schematic representation of experimental set up and workflow for the co-culture system utilized in this study. The co-cultures (left), were seeded and grown with both cell types in a single flask. The artificial mixtures (right), were seeded and grown with each cell type separately. A mixture was created after cell collection with equal volume (but often different concentrations, due to differences in growth rates) of each cell type. This artificial mixture acted as a control for ddPCR. gDNA was extracted from the co-cultures and the artificial mixtures and processed for analysis by ddPCR.

2a.

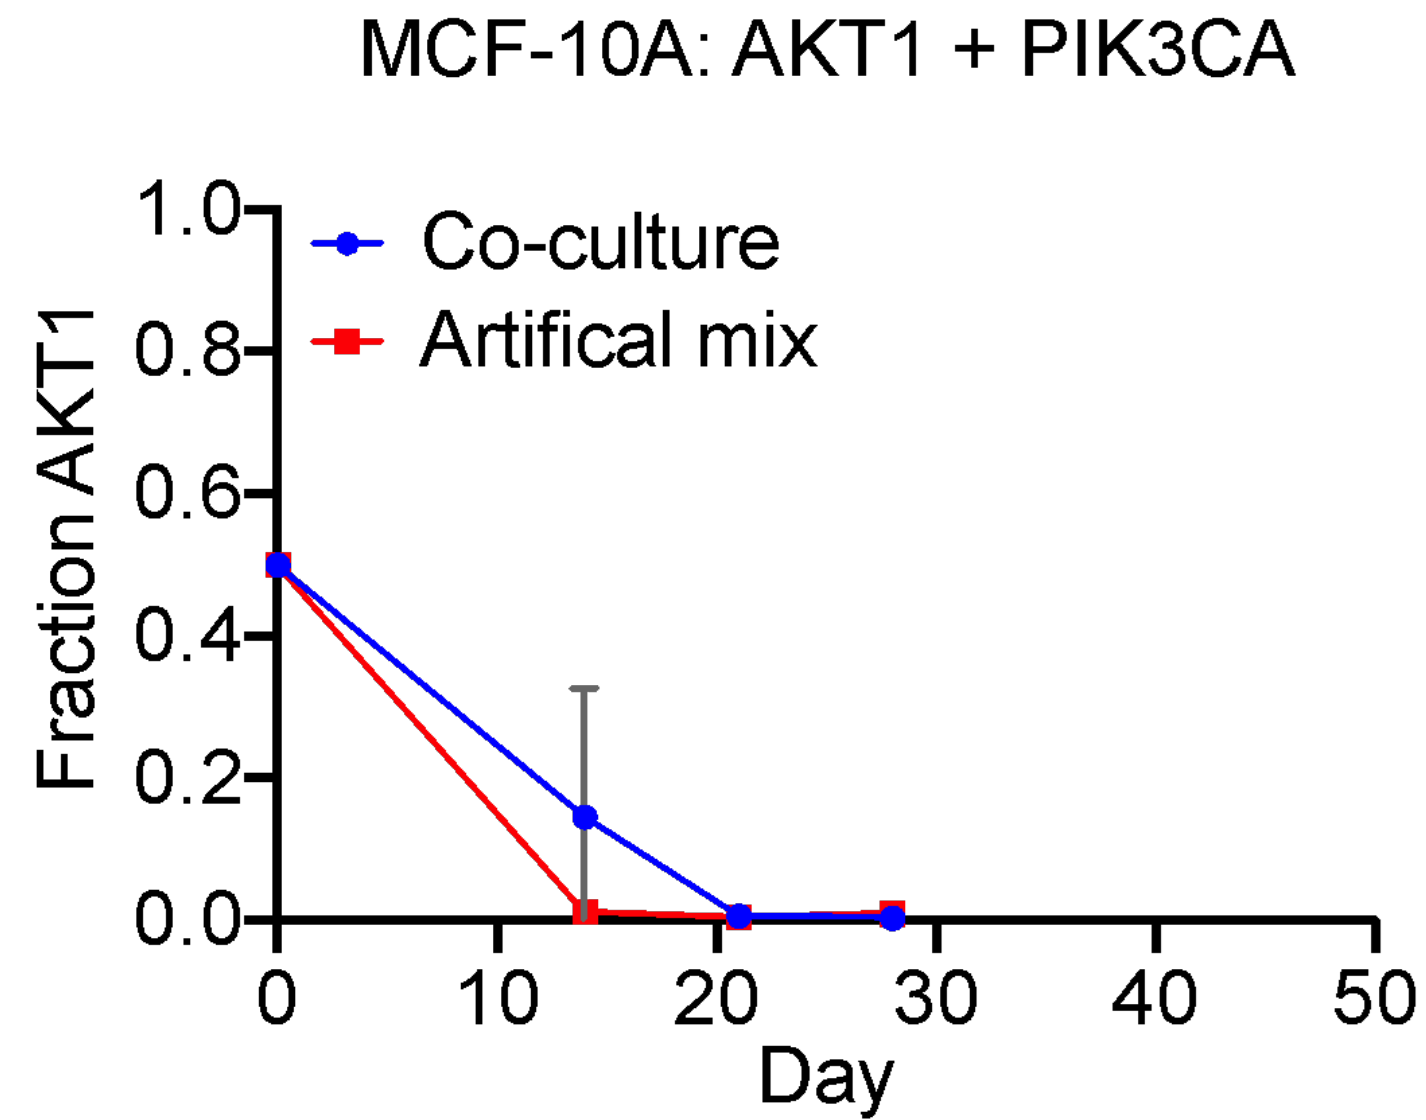

2b.

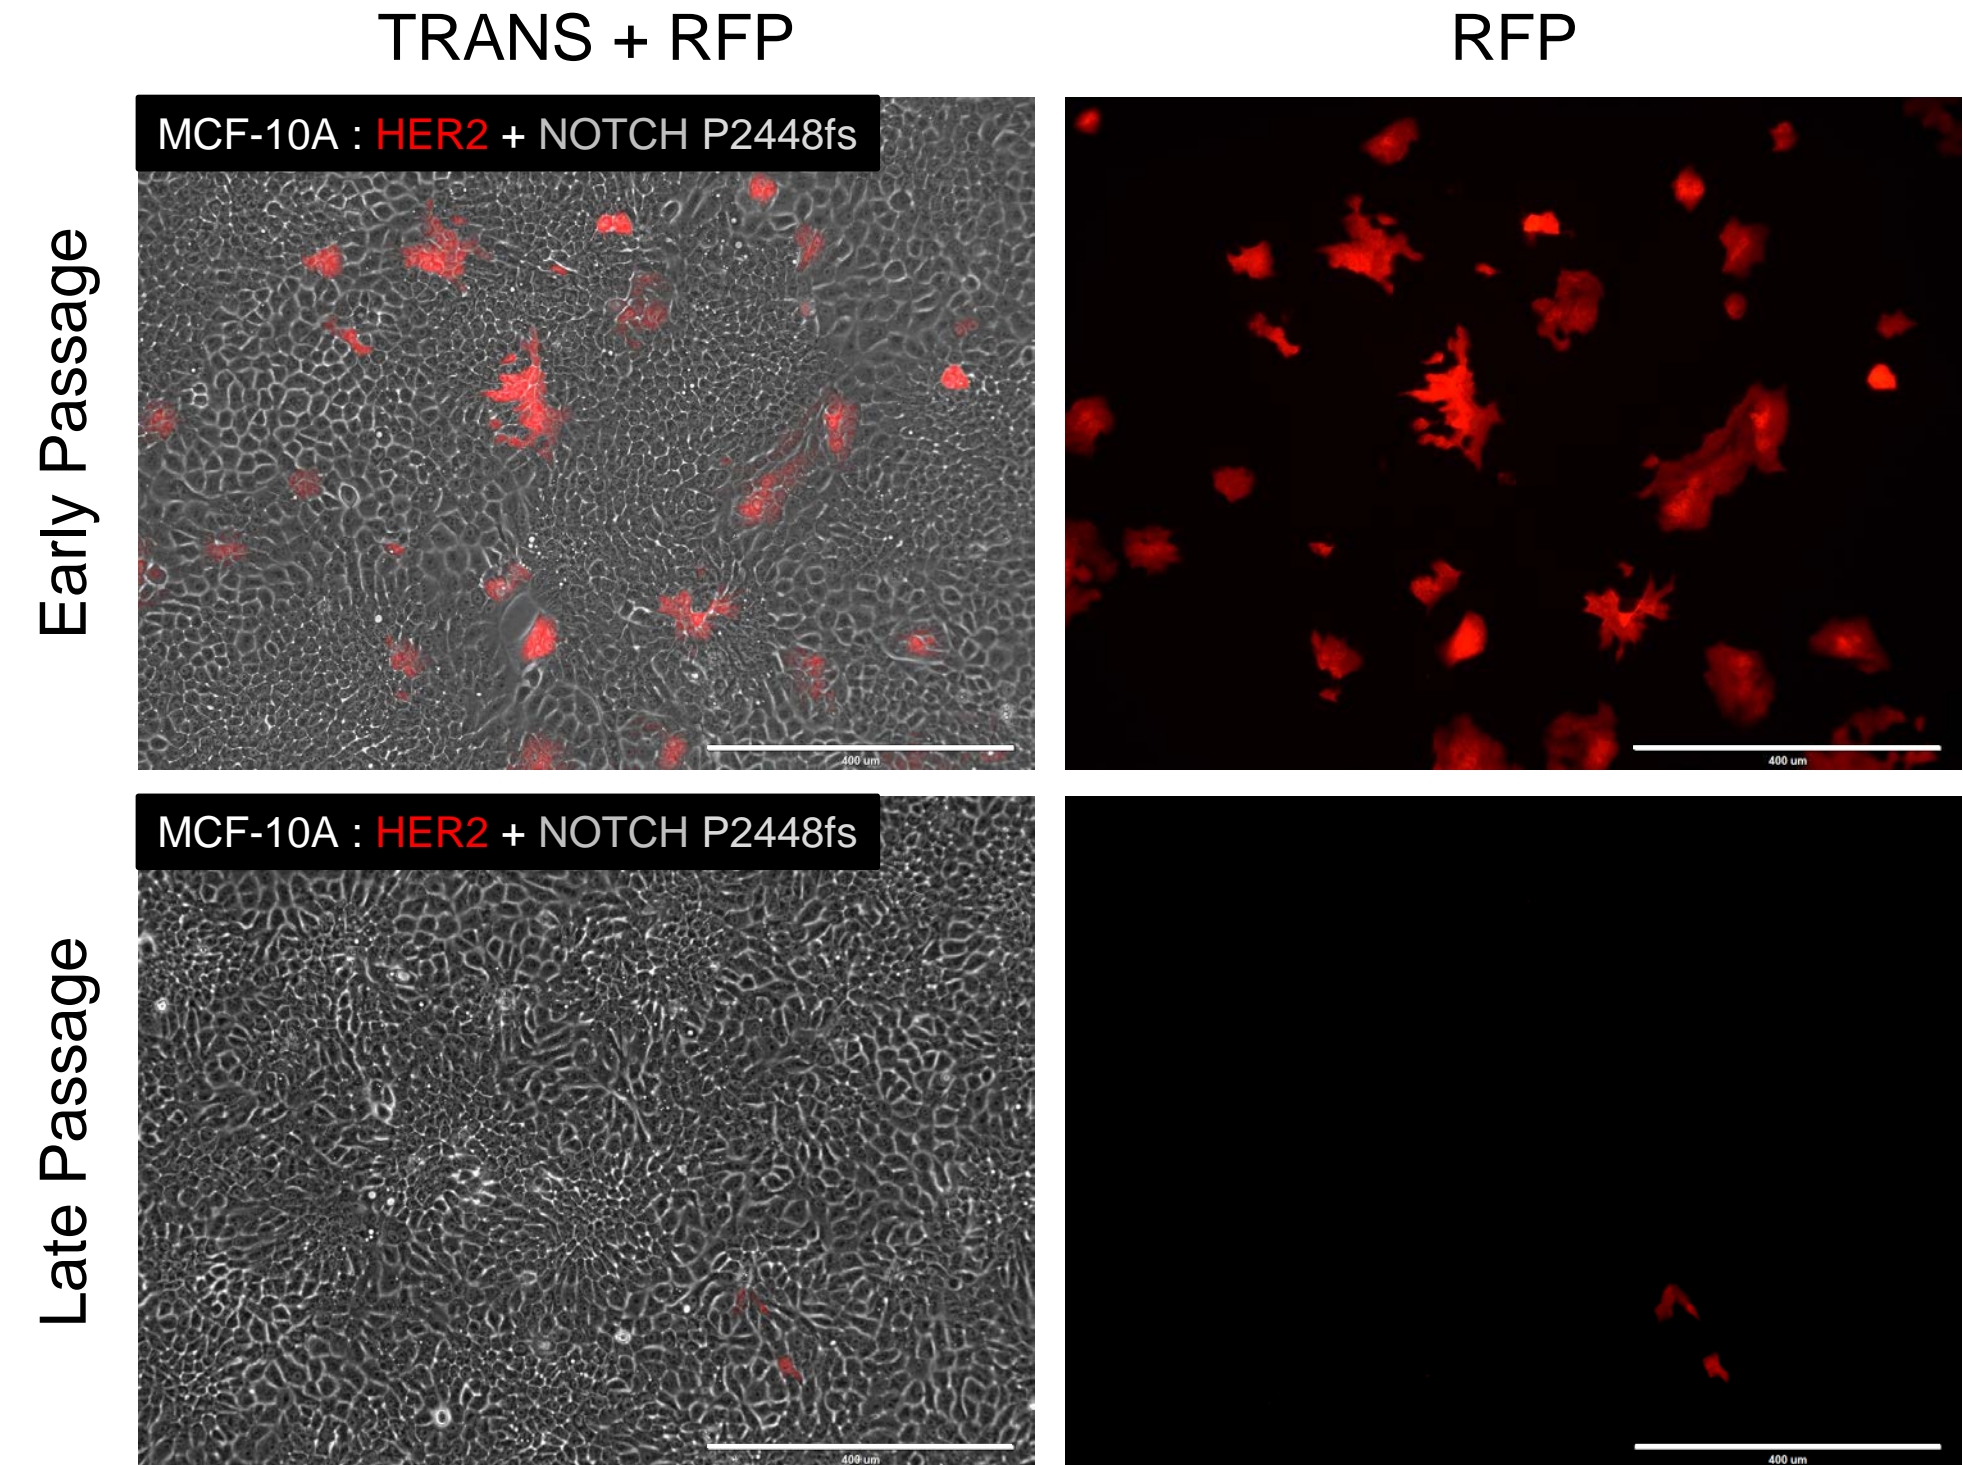

**Supplementary Fig. S2: *AKT1* mutant cells do not gain EGF-independence in co-culture with *PIK3CA* mutant cells and *NOTCH1* mutant cells do not impart EGF independence to *HER2* mutant cells.**

a) Droplet digital PCR (ddPCR) showing the fraction of MCF-10A *AKT1* E17K mutants in a 1:1 co-culture with *PIK3CA* mutants (red) and in an artificial mixture with *PIK3CA* mutants (blue). b) Representative microscopic images showing the growth of *HER2* mutants (red) and *NOTCH1* mutants (untagged) in co-culture. The early and late passage indicate day 27 and day 46 respectively. Scale = 400uM

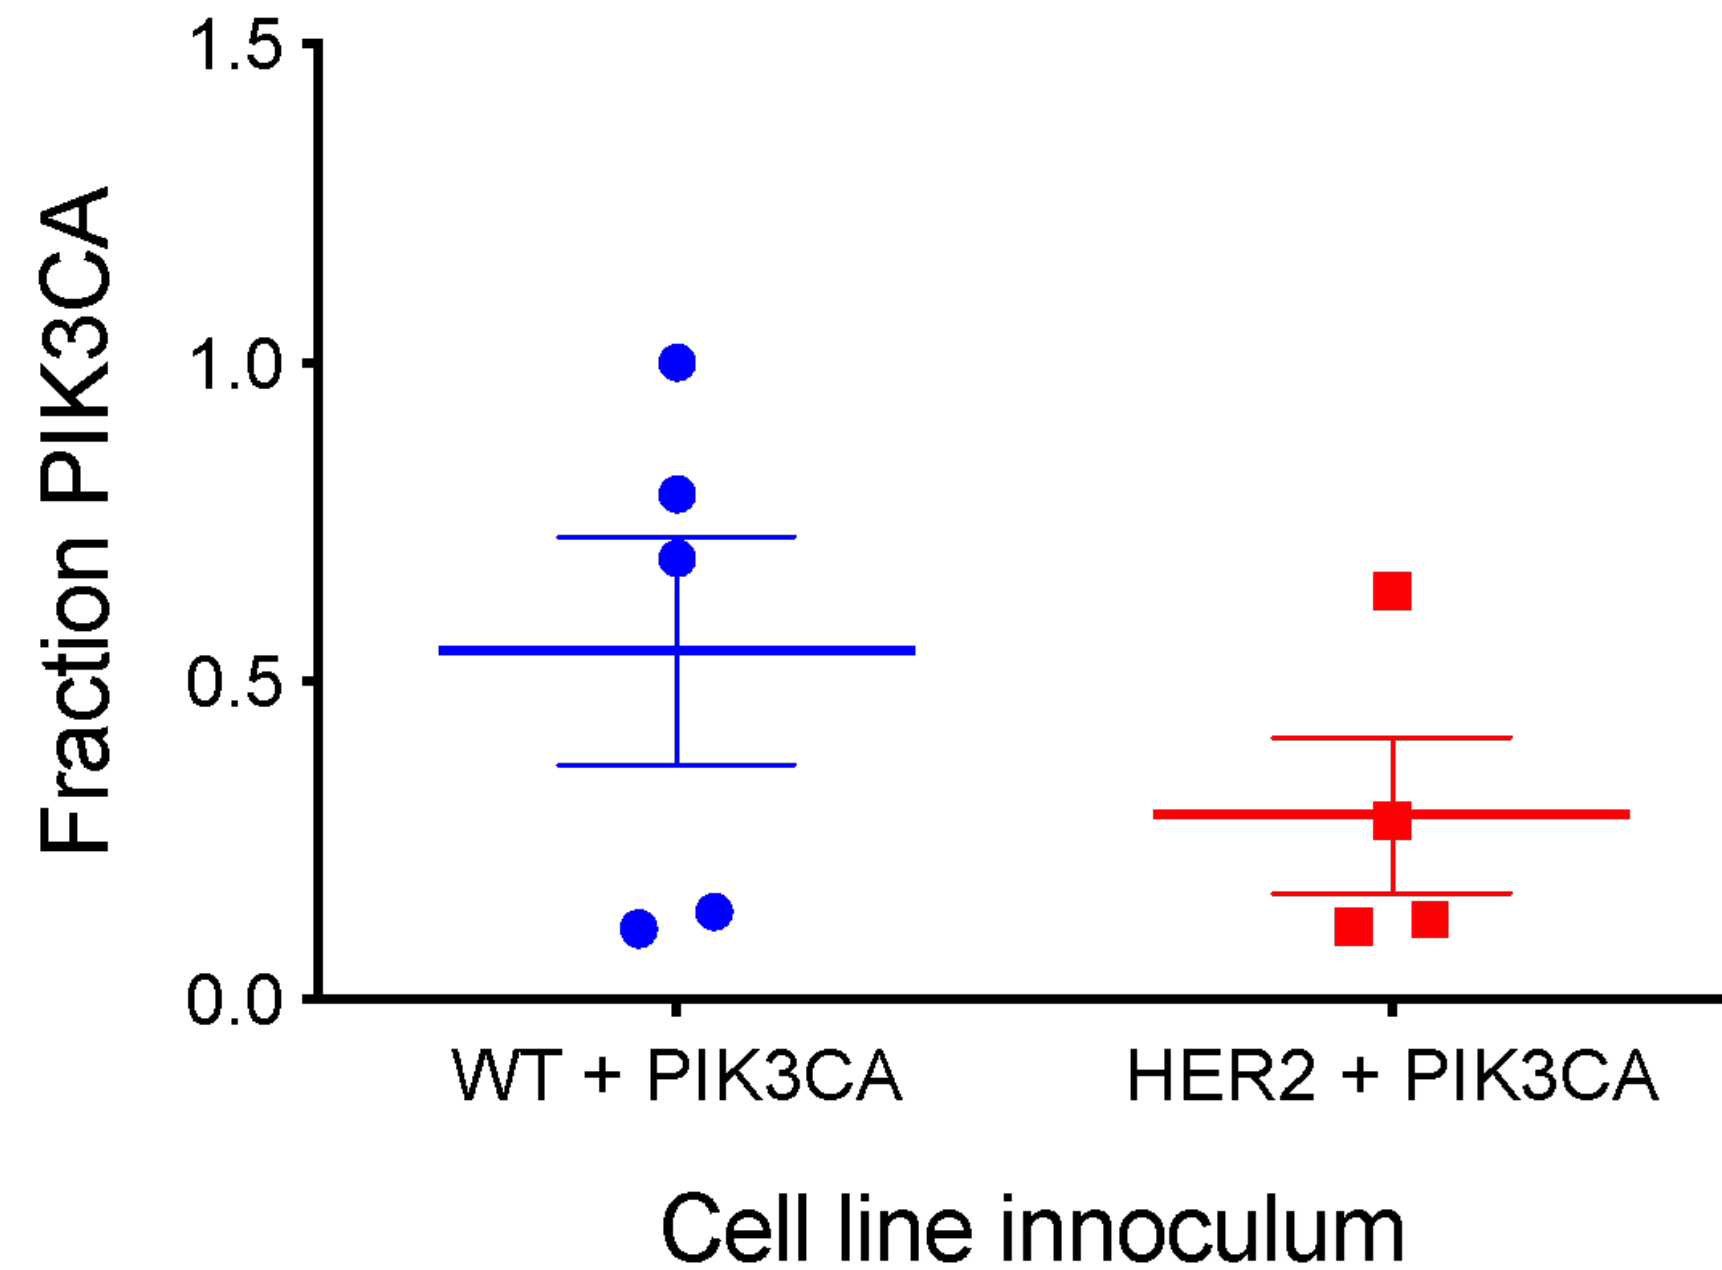

**Supplementary Fig. S3: Analysis of cellular composition of co-inoculated tumors *in vivo***

The panel of MCF-7 modified cells were injected subcutaneously into athymic nude mice with estrogen supplementation. Tumors were homogenized and processed for analysis by ddPCR. Results are shown as the fraction of *PIK3CA* mutant cells in the tumor. n=5 for WT:*PIK3CA* and n=4 for *HER2:PIK3CA*.

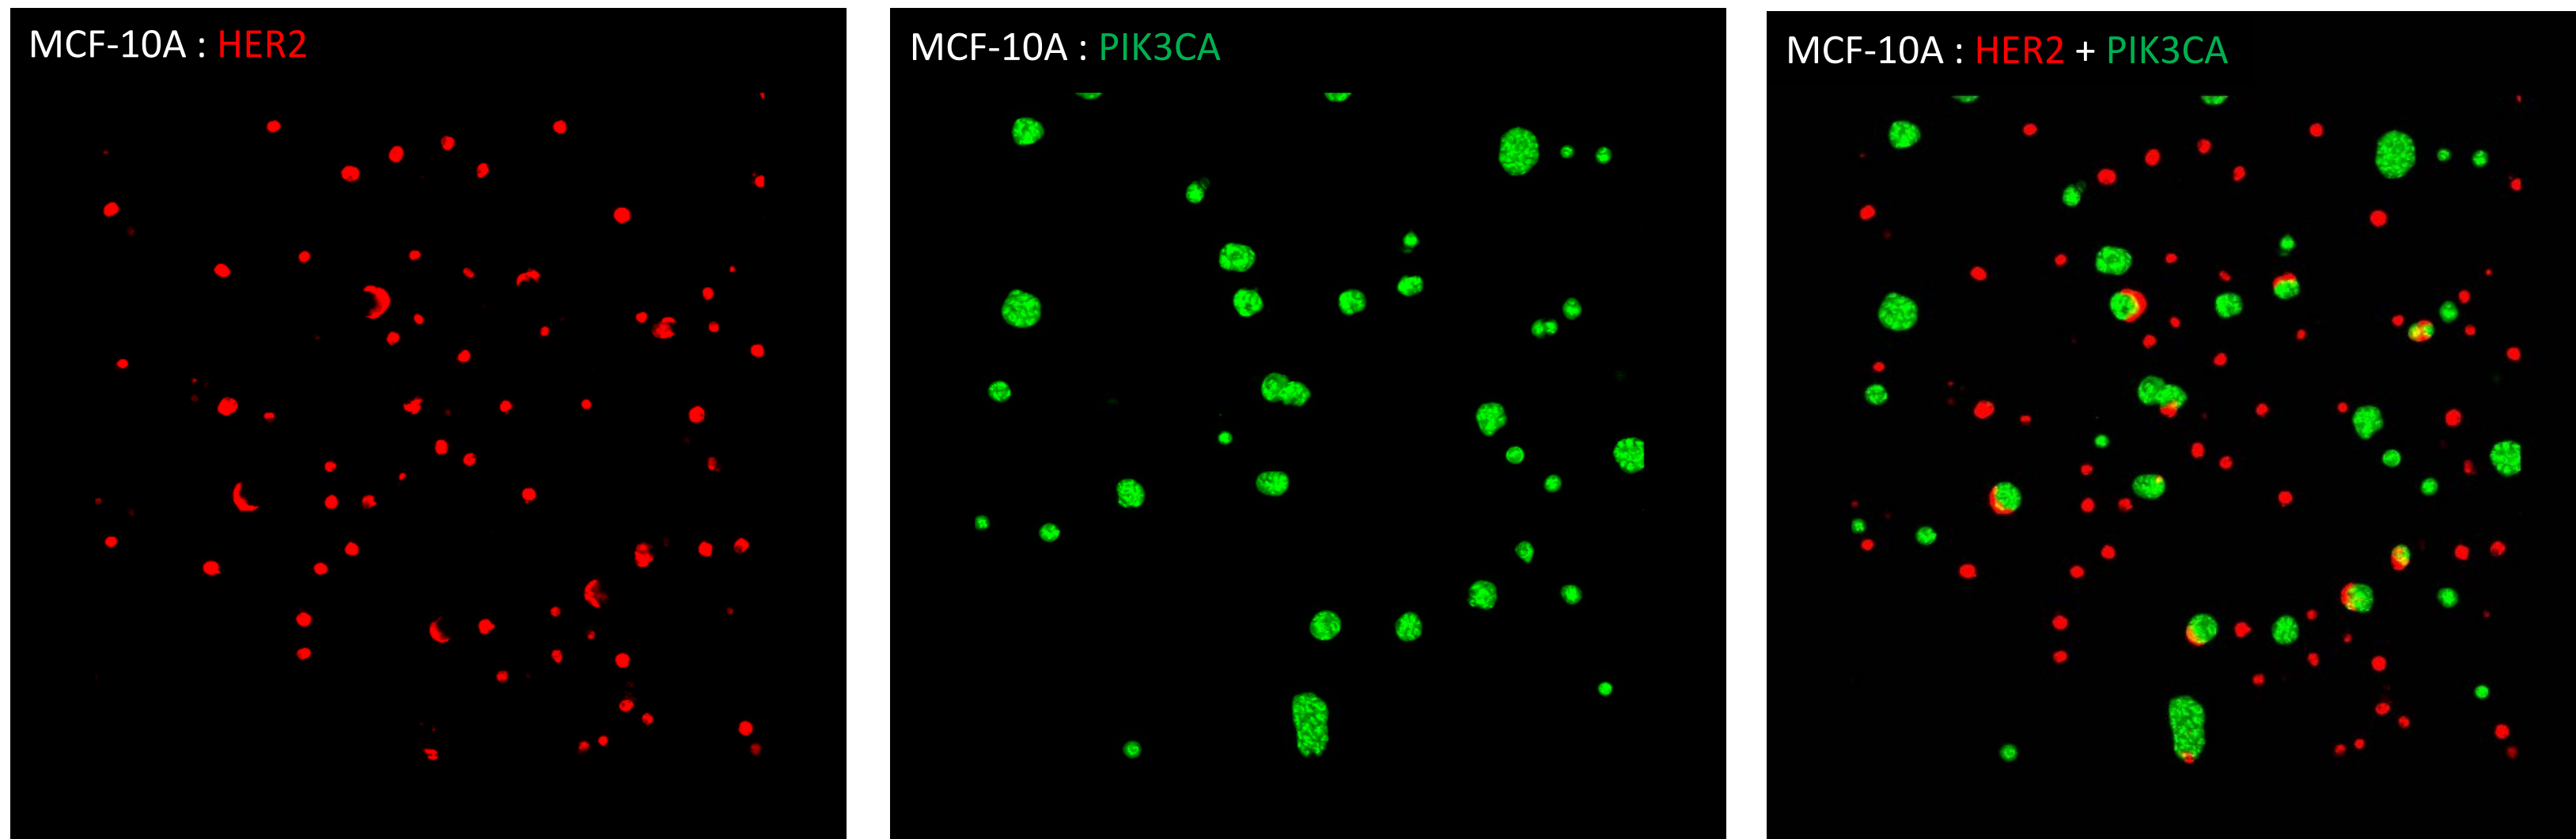

**Supplementary Fig. S4: Growth dynamics of *HER2* and *PIK3CA* mutant cells in 3D basement membrane matrix.**

Representative confocal microscopy images of colonies formed in co-cultures of *HER2* and *PIK3CA* mutant cells in the MCF-10A background. Individual images of *HER2* mutant cells (red) and *PIK3CA* mutant cells (green) are shown, in addition to the overlay. For animation, please see Supp. Video 2.

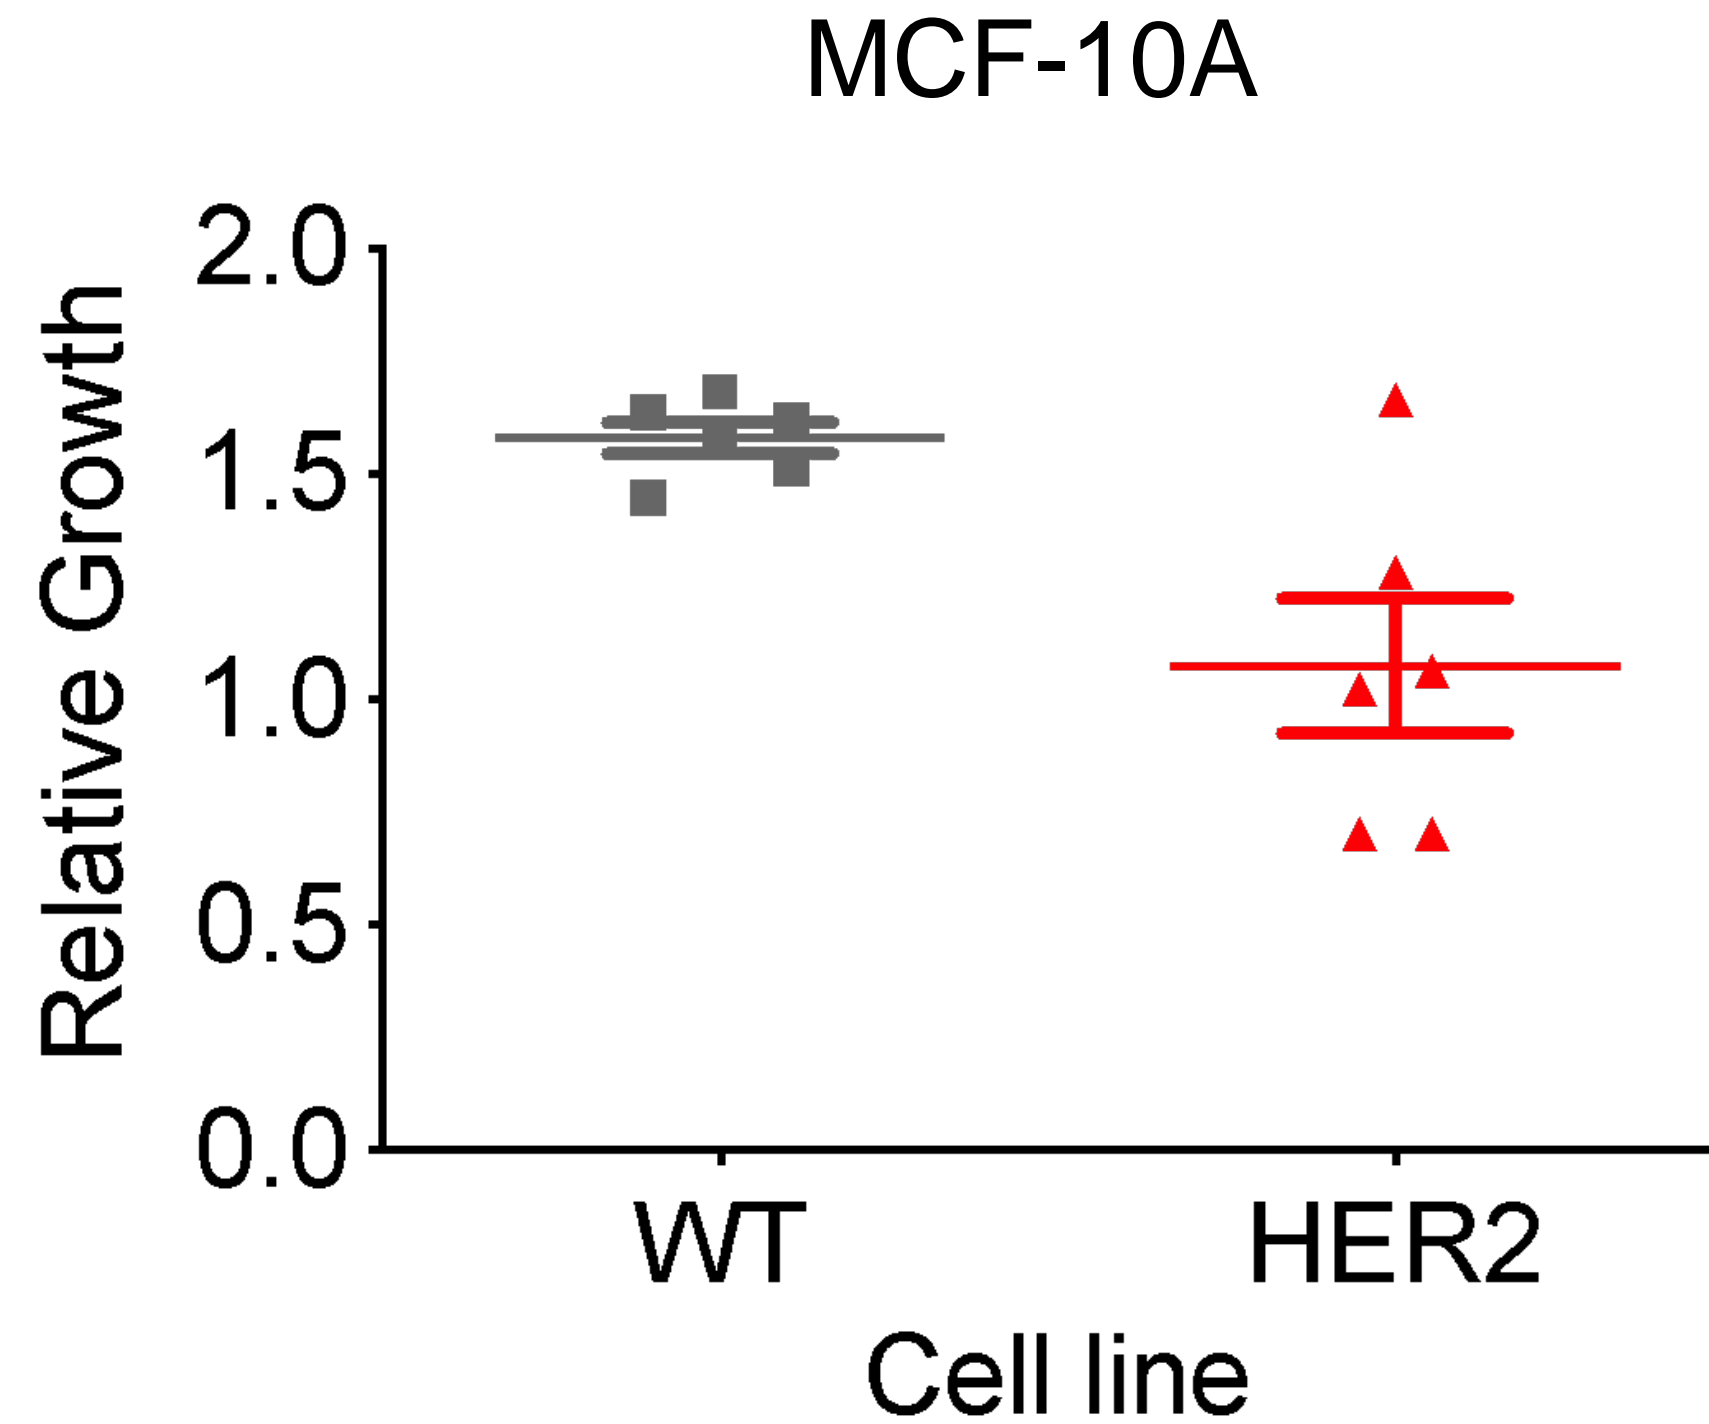

**Supplementary Fig. S5: Effect of *PIK3CA* mutant cell conditioned media on wild-type and *HER2* mutant cell growth**

Transwell assays in which *PIK3CA* mutant MCF-10As were plated into transwell plates and WT or *HER2* mutant cells were seeded onto transwell inserts. The WT:*PIK3CA* and *HER2*:*PIK3CA* pairs were grown with shared media for 7-10 days and then cell counts were performed (n=6).

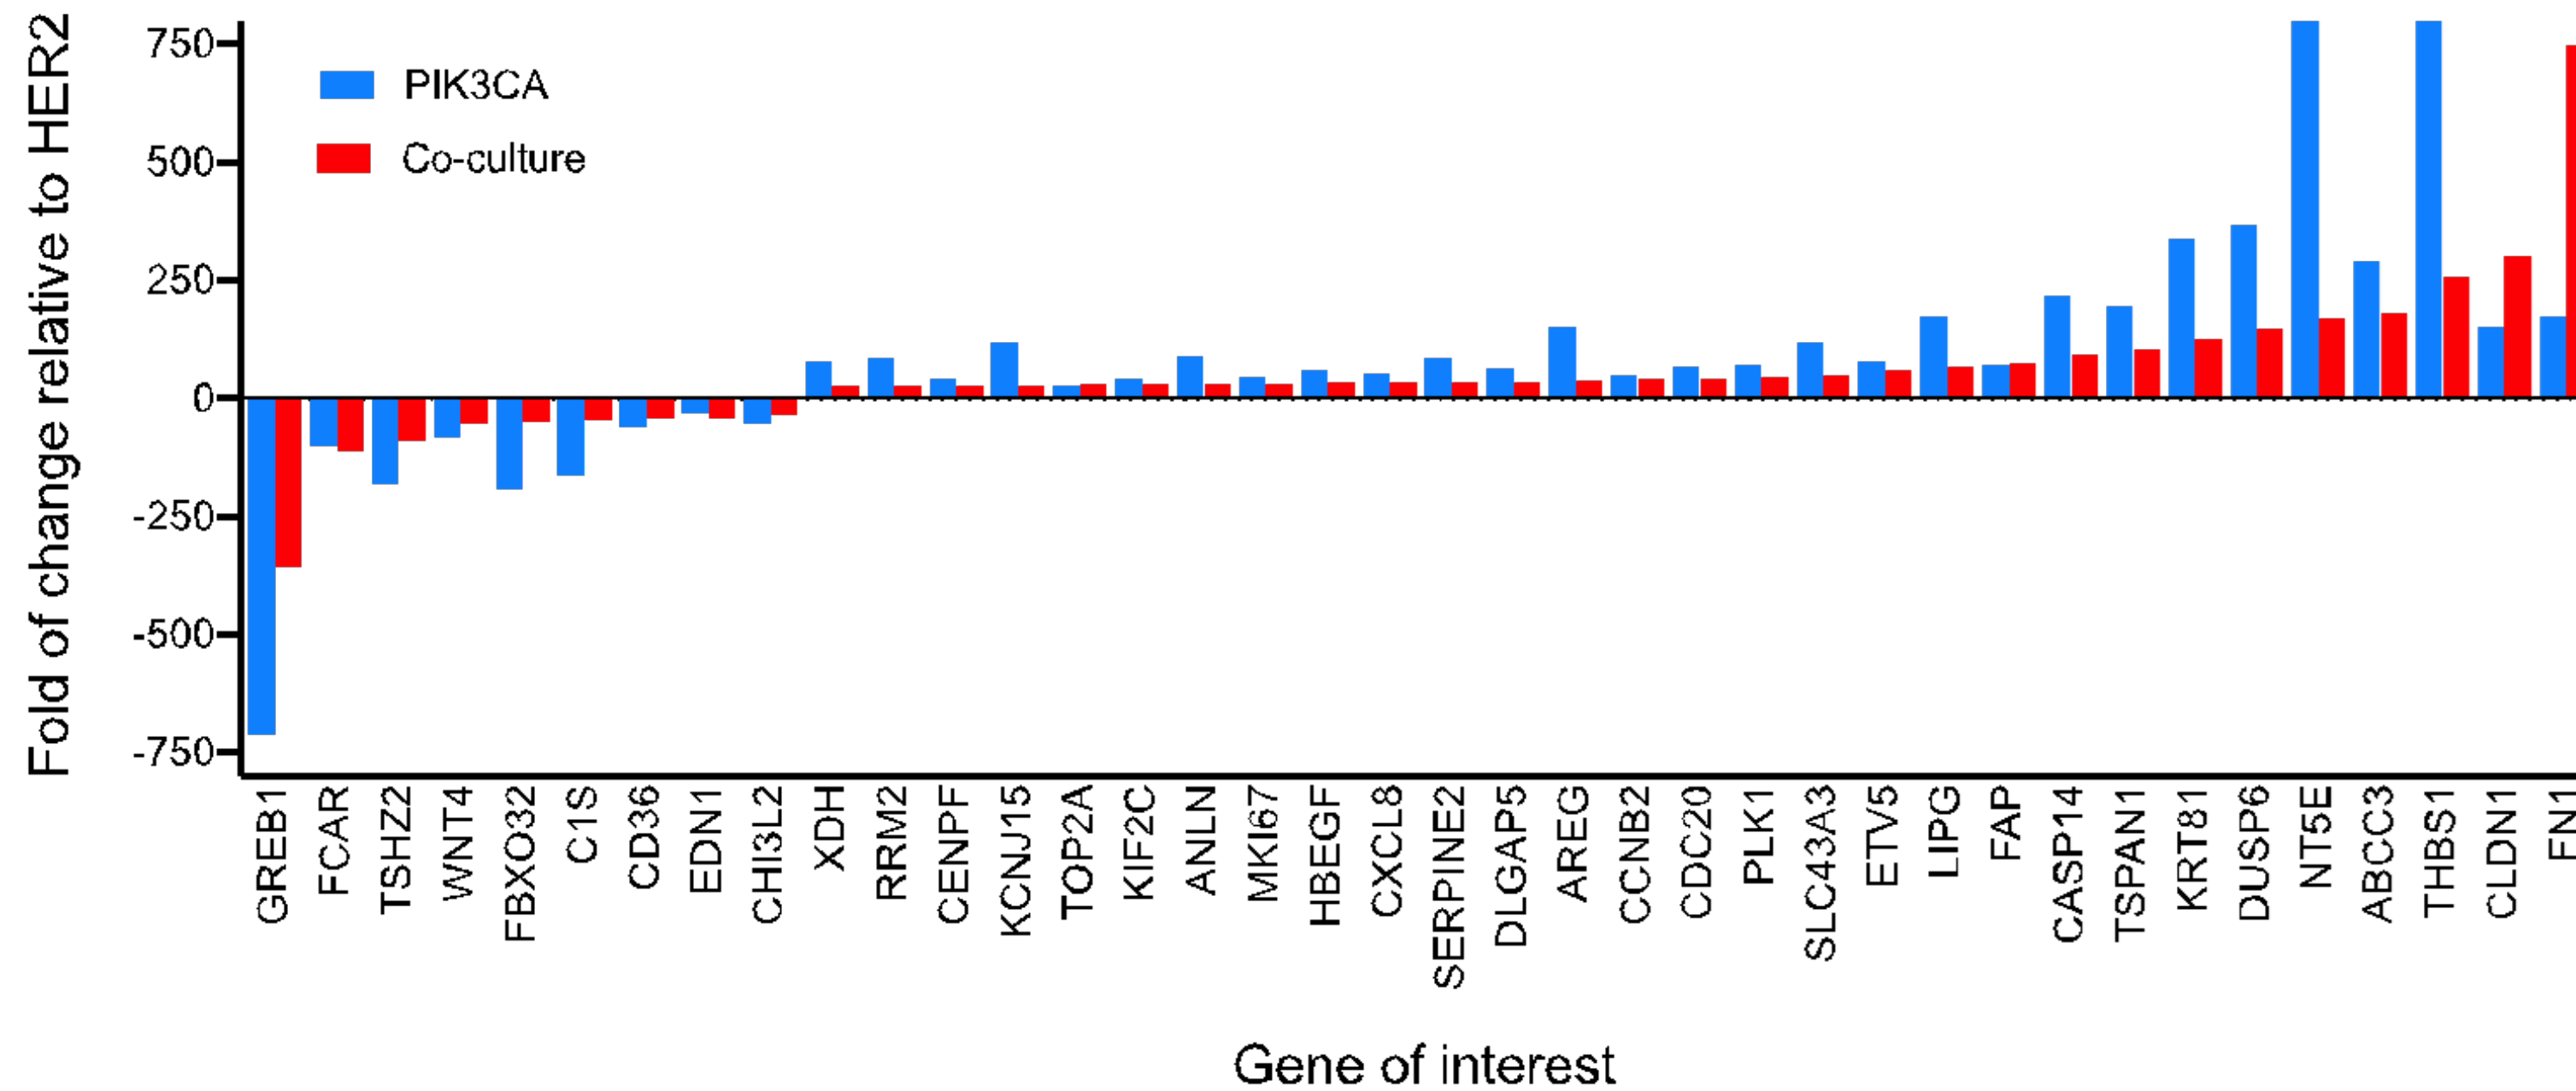

**Supplementary Fig. S6: Changes in gene regulation of *PIK3CA* and *HER2* co-cultures.**

Transcriptome-wide analysis of MCF-10A *PIK3CA* and *HER2* mutant cells grown individually and in co-culture. Fold change in gene expression of individually-grown *HER2* mutant cells was compared to the individually-grown *PIK3CA* mutant cells (blue) and to the co-cultured cells (red). The Clariom S Array was used to assess gene expression differences. Analysis was performed using TAC software. <-30 and >30-fold cutoffs were used.

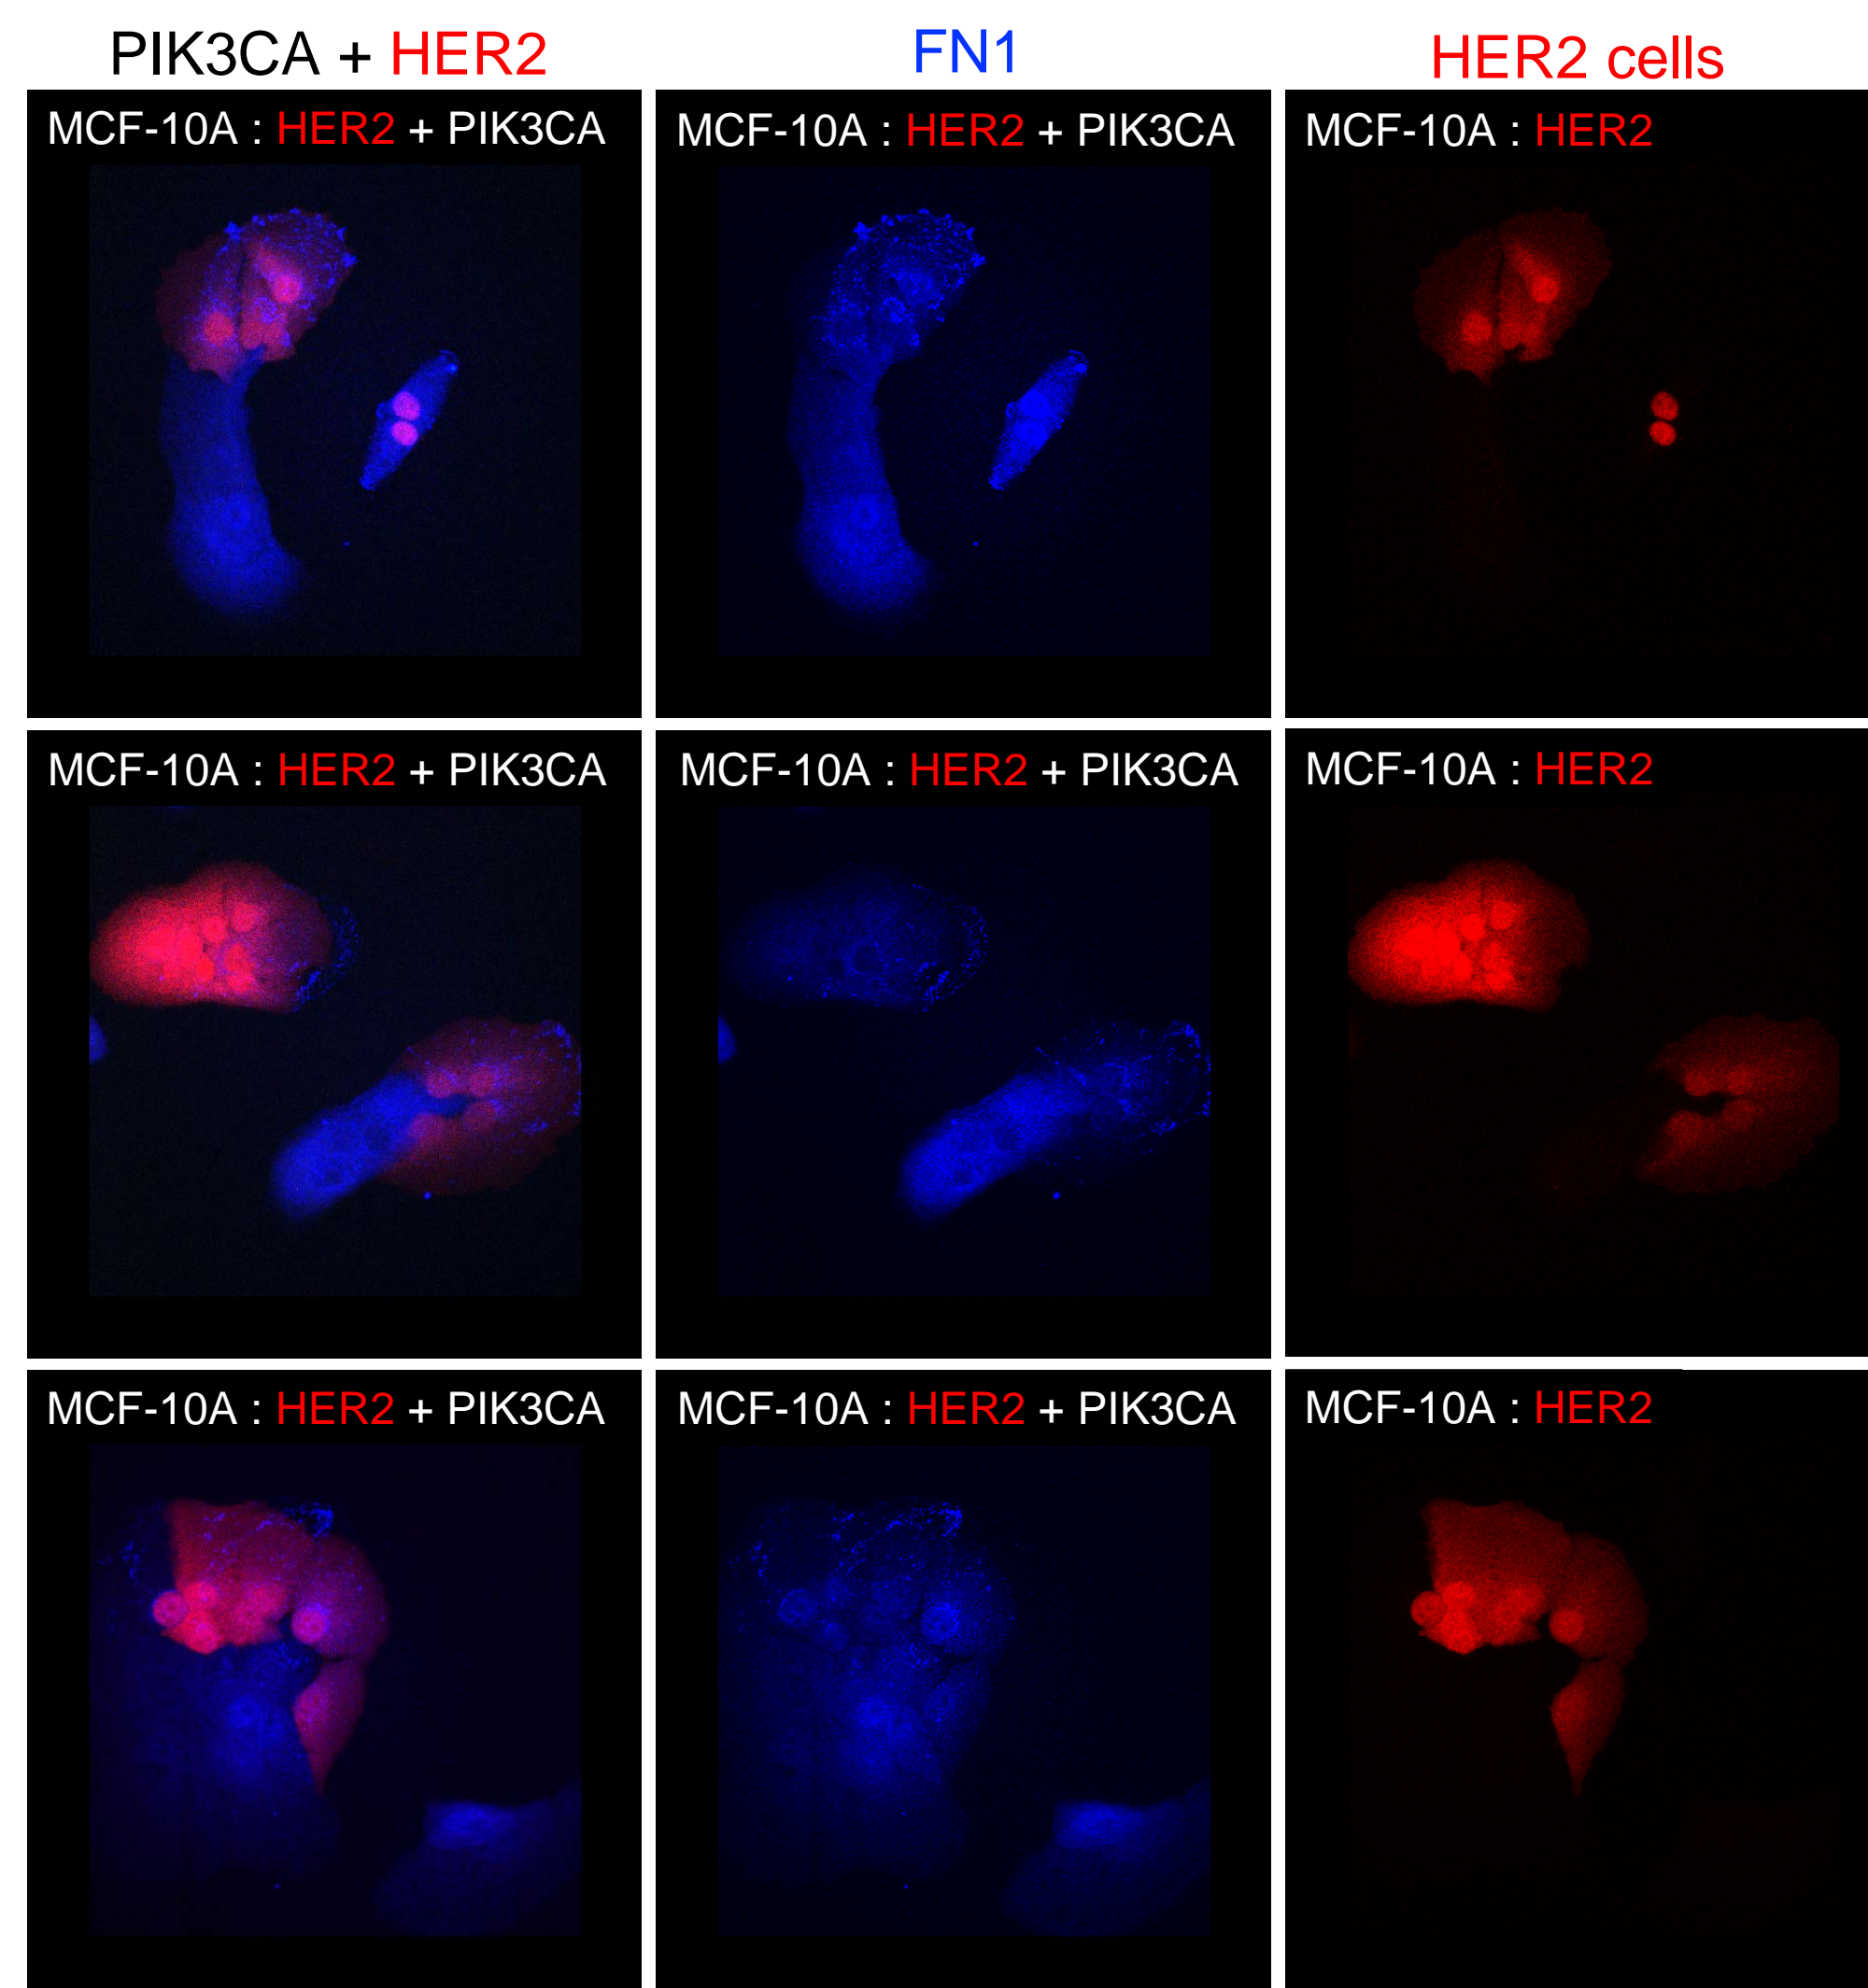

**Supplementary Fig. S7: Immunofluorescence of fibronectin expression in *in vitro* HER2:PIK3CA co-cultures**

Representative images of fibronectin expression in co-cultures of MCF-10A *HER2* and *PIK3CA* mutant cells using IHC and confocal microscopy after 5-7 days of growth. Fibronectin is shown in blue, *HER2* mutant cells in red, and *PIK3CA* mutant cells are untagged.

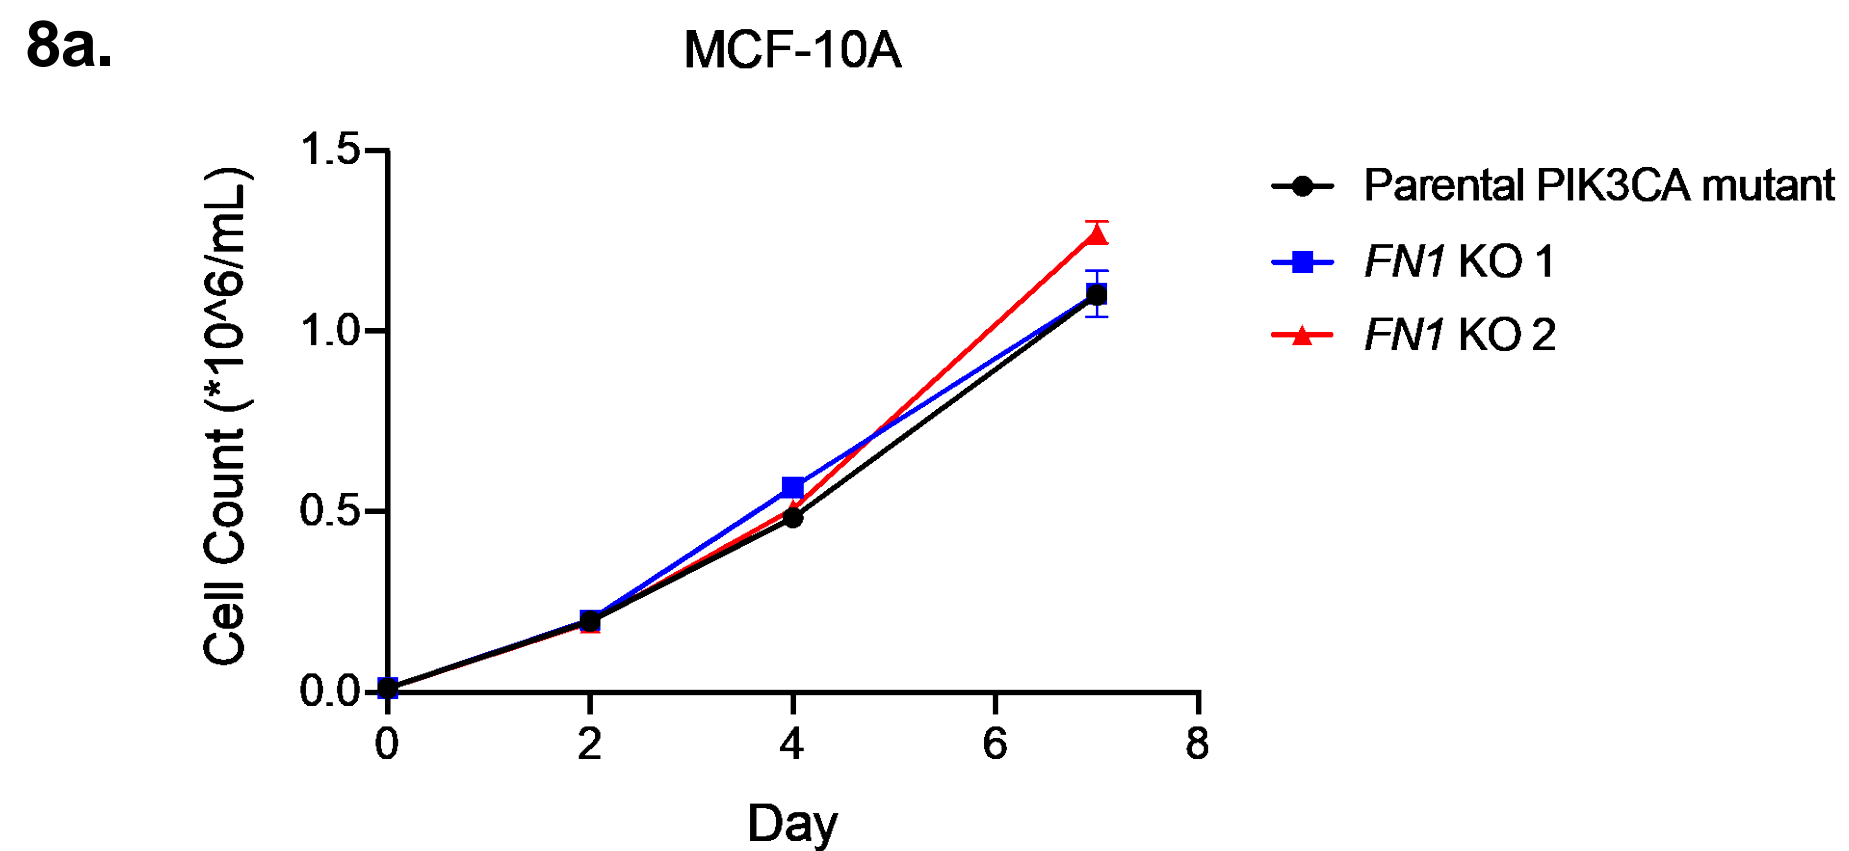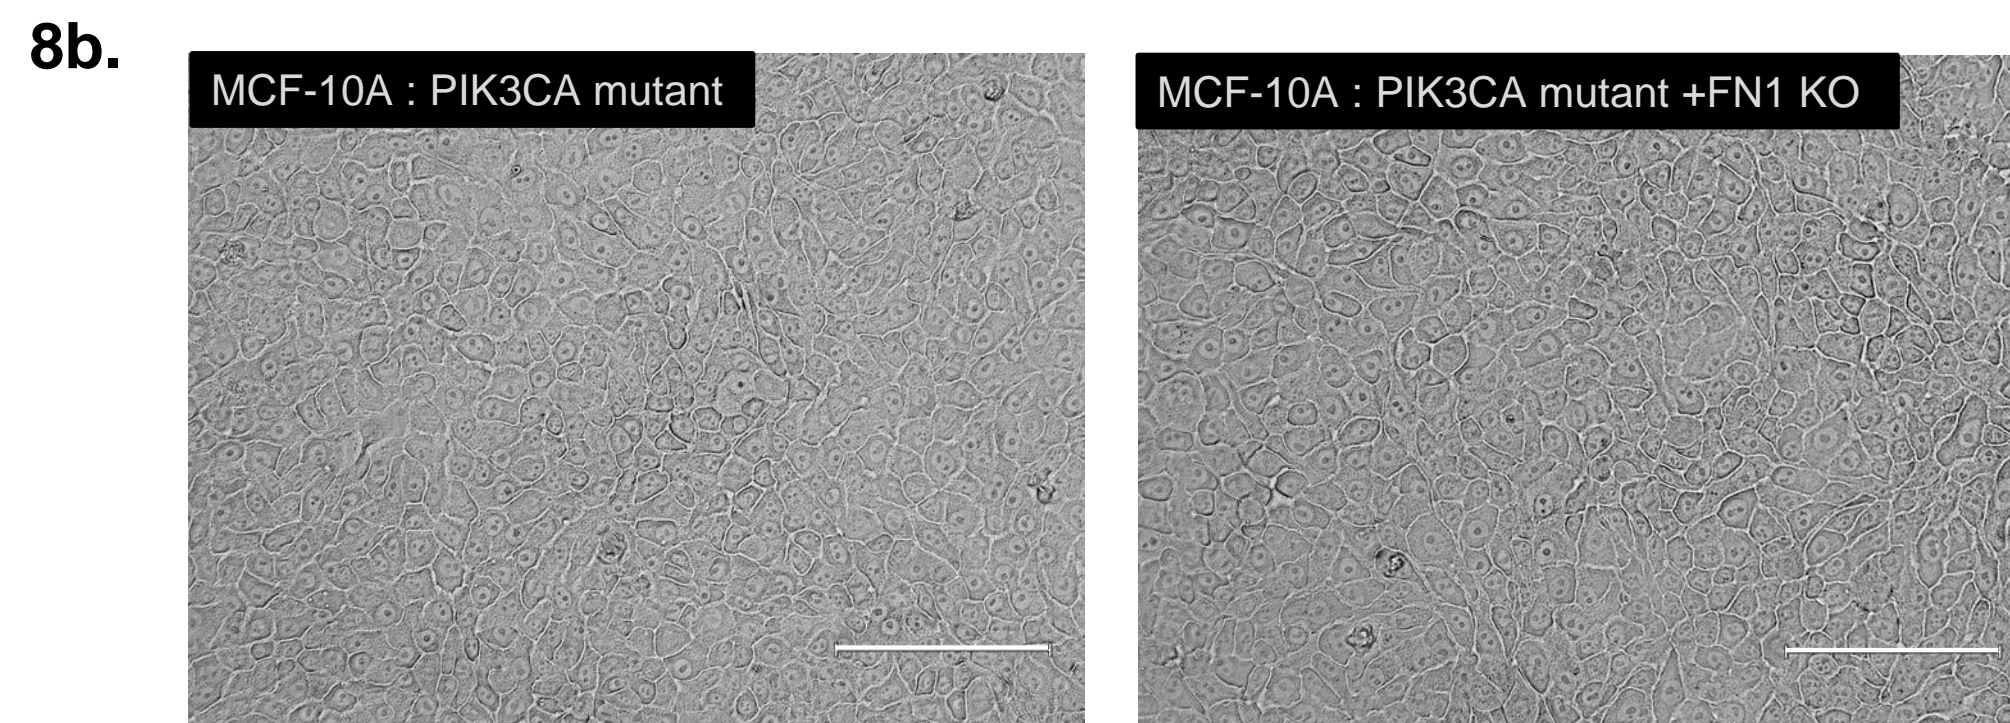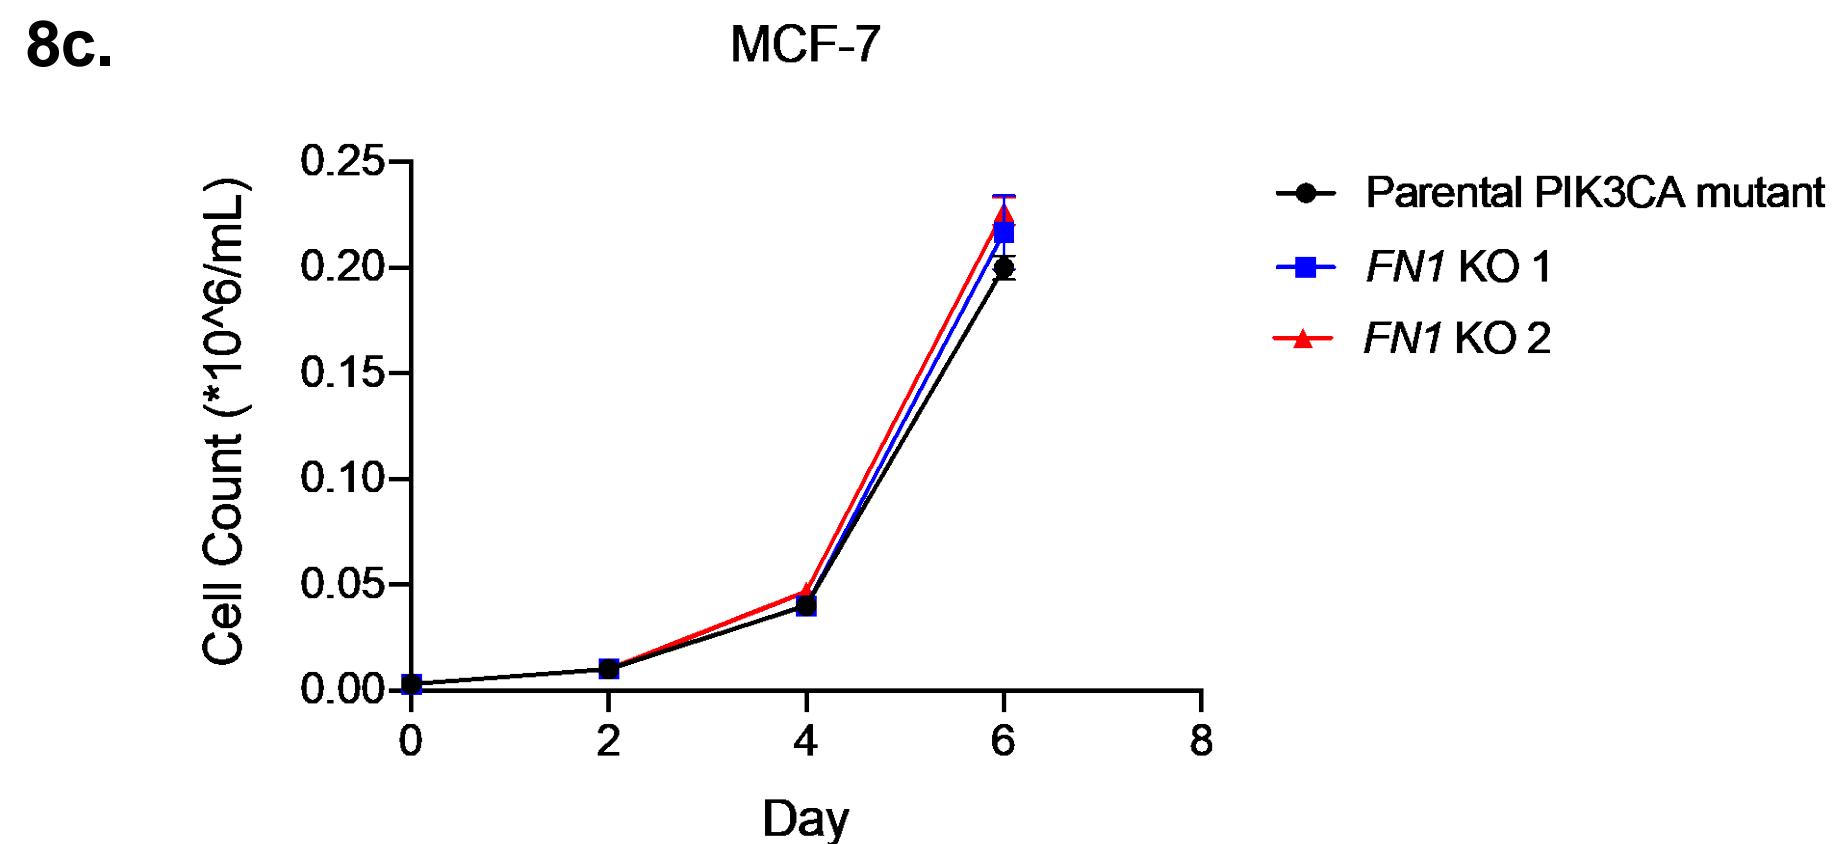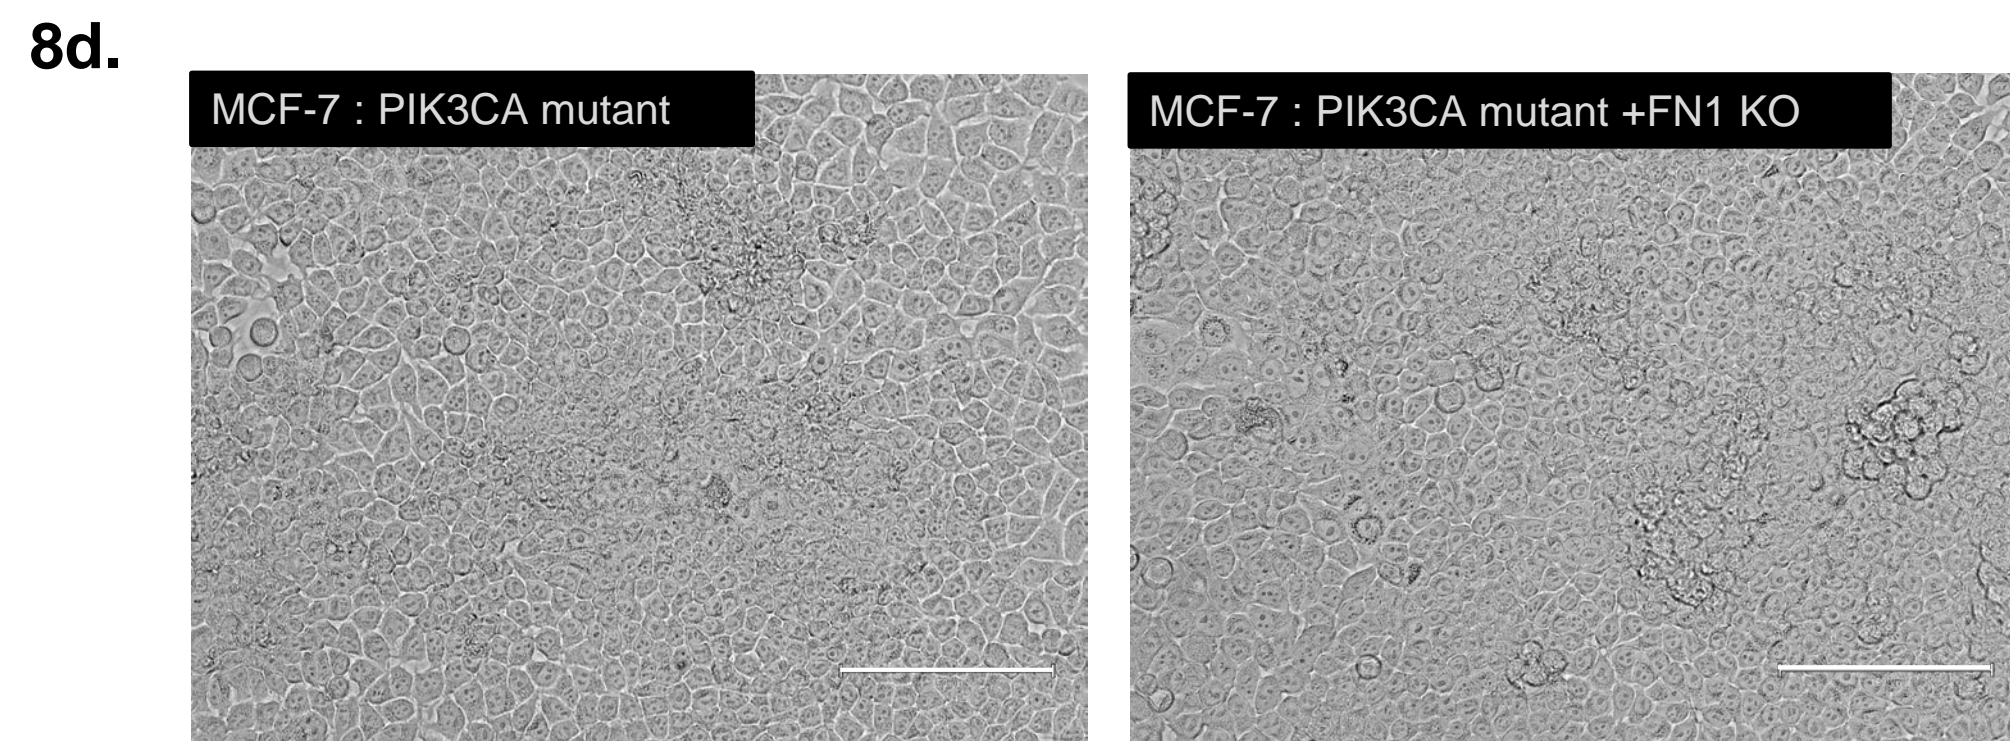

**Supplementary Fig. S8: Characterization of *FN1* knockouts**

a) Proliferation curves comparing the growth of the the *FN1* knockouts in MCF-10A background to their parental *PIK3CA* mutants. Cells were seeded at a density of 10000 cells per well. b) Representative microscopic images comparing the morphology of the MCF-10A *FN1* knockouts to the *PIK3CA* mutants. Scale = 150uM. C) proliferation curves and d) representative microscopic images comparing the growth and morphology of the MCF-7 *FN1* knockouts to their parental controls. The cells were seeded at a density of 3000 cells per well for the growth assay. Scale = 150uM



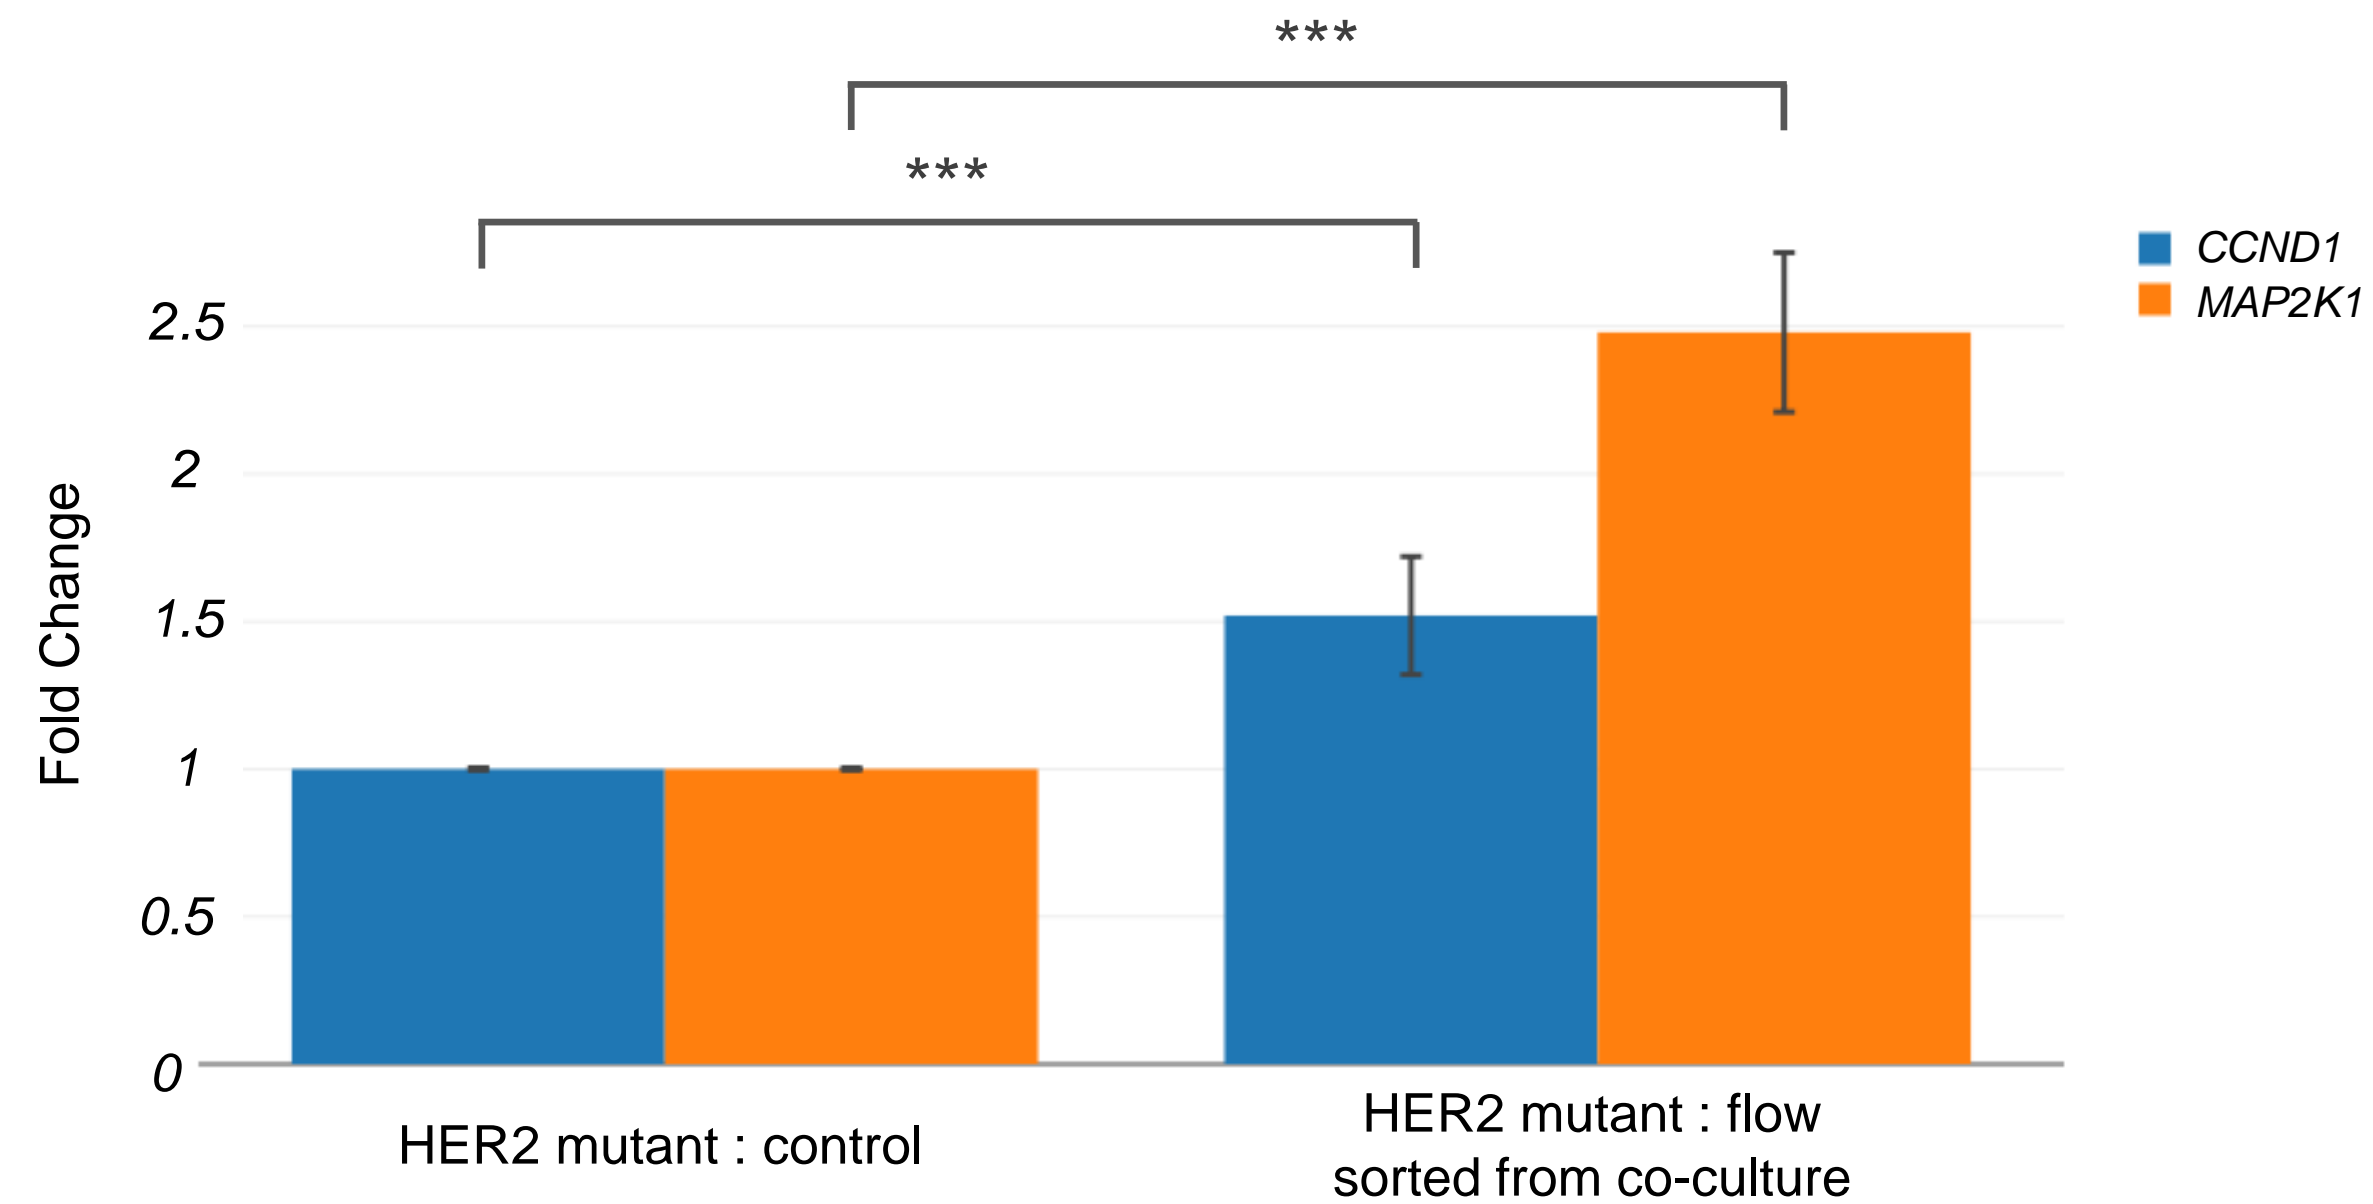

**Supplementary Fig. S9: Changes in gene expression in HER2 mutants grown in co-culture**

Flow sorted microarray data analysis showing an upregulation in *CCND1* and *MAP2K1* expression in the *HER2* mutants grown in co-culture when compared to those grown in isolation. n=4, p>0.001, calculated using a student's t-test.

**Supplementary Table S1:** The mutational profile and growth factor dependence of the cell lines used in this study.

| <b>CELL-LINE</b> | <b>PARENTAL</b> | <b>MUTATION OF INTEREST</b>                                                                | <b>GROWTH FACTOR/HORMONE DEPENDENCE</b> |
|------------------|-----------------|--------------------------------------------------------------------------------------------|-----------------------------------------|
| PIK3CA           | MCF-10A         | Heterozygous PIK3CA E545K mutation knocked into MCF-10A                                    | EGF independent                         |
| HER2             | MCF-10A         | Heterozygous HER2 L755S mutation knocked into MCF-10A                                      | EGF dependent                           |
| WT               | MCF-10A         | Heterozygous SF3B1 R702R (silent mutation) knocked into MCF-10A                            | EGF dependent                           |
| AKT1             | MCF-10A         | Heterozygous AKT1 E17K mutation knocked into MCF-10A                                       | EGF dependent                           |
| PIK3CA           | MCF-7           | Parental MCF-7 with 3 copies of the PIK3CA gene. 2 copies with E545K mutation, 1 WT copy   | Estrogen dependent                      |
| WT               | MCF-7           | Corrected MCF-7 where the two PIK3CA E545K mutant alleles have been reverted to wildtype   | Estrogen dependent                      |
| HER2             | MCF-7           | WT corrected MCF-7 with a single HER2 L755S mutation knocked in as a heterozygous mutation | Estrogen dependent                      |

**Supplementary Table S2:** Separate table included

**Supplementary Table S3:** A list of primers and probes used for ddPCR assays and the guide RNAs and primers used for creating FN1 knockouts using the CRISPR-Cas 9 system

| GENE DETAILS                                 | TYPE                         | SEQUENCE                       |
|----------------------------------------------|------------------------------|--------------------------------|
| DROPLET DIGITAL PCR - Dual Mutant Assay      |                              |                                |
| <i>PIK3CA</i> E545K                          | Mut Probe                    | CTCTGAAATCACTAAGCAGGAGAAAGATTT |
|                                              | Dual Mut Forward Primer      | TCAAAGCAATTTCTACACGAGAT        |
|                                              | Dual Mut Reverse Primer      | ATTTTAGCACTTACCTGTGACT         |
| <i>HER2</i> L755S                            | Dual Mut Probe               | CCATCAAAGTGTGCGAGGGAAAACA      |
|                                              | Dual Mut Forward Primer      | CTGATGGGGAGAATGTGAAA           |
|                                              | Dual Mut Reverse Primer      | TCTAAGATTTCTTTGTTGGCTTTG       |
| <i>SF3B1</i> R702R                           | Dual Mut Probe               | AGCAGCAGAAAGTTAGGACC           |
|                                              | Dual Mut Forward Primer      | TTTTGTAGGTCTTGTGGATGAG         |
|                                              | Dual Mut Reverse Primer      | CAATGGCCAAAGCACTGA             |
| DROPLET DIGITAL PCR – Traditional Assay      |                              |                                |
| <i>PIK3CA</i> E545K                          | WT Probe                     | CTCTGAAATCACTGAGCAGGAGAAAGATT  |
|                                              | Mut Probe <sup>b</sup>       | CTCTGAAATCACTAAGCAGGAGAAAGATTT |
|                                              | Forward Primer               | TCAAAGCAATTTCTACACGAGATCCT     |
|                                              | Reverse Primer               | CTCCATTTTAGCACTTACCTGTGACT     |
| CRISPR-Cas9 knockouts                        |                              |                                |
| <i>FN1</i> (MCF-10A)                         | Guide RNA                    | GAATGGACCTGCAAGCCCAT           |
| <i>FN1</i> (MCF-7)                           | Guide RNA                    | TCACACACCTATGGGCTTGC           |
| <i>FN1</i> (MCF-10A and MCF-7 <sup>a</sup> ) | Screening: Forward Primer    | CCTGATGTGGCCTTTTCACT           |
|                                              | Screening: Reverse Primer    | AGACCTGAATTCCAGTGAAAACC        |
|                                              | Screening: Sequencing Primer | AGACCTGAATTCCAGTGAAAACC        |

*a* – The same screening primers were used for both the MCF-10A and MCF-7 knock outs

*b* – The same *PIK3CA* E545k mutant probe was used for traditional and dual mutant ddPCR assays

## Supplementary Methods:

### Cell fraction calculations for droplet digital PCR

1) For MCF-10A background *HER2* L755s and *SF3B1* R702R co-cultures with *PIK3CA* E545K mutant cells. Each cell line contains a single-copy heterozygous mutation, allowing for the quantification of one cell per mutant allele using the Dual Mutant Assay, assuming no cell fusions.

$$y = a/(a+b)$$

Where,

y = fraction of cell line A

a = # of positive "A" genotype mutant droplets = # of cell line A cells

b = # of positive *PIK3CA* E545K mutant droplets = # *PIK3CA* mutant cells

2) For MCF-7 background WT *PIK3CA* cells co-cultured with parental MCF-7s. The WT cells contain 3 WT alleles of *PIK3CA* and the parental MCF7s contain 2 mutant copies of *PIK3CA* to 1 WT. Cellular percentages were calculated using the traditional single-locus WT/Mut assay and according to the equation 2. The number of MCF7 cells was calculated by dividing the number of *PIK3CA* mutant droplets by 2. The number of WT cells was then calculated by subtracting the number of MCF7 cells that contain a single WT copy of *PIK3CA* from the number of WT droplets and then dividing that number by 3.

$$y = (a/2)/((a/2)+(b-(a/2))/3)$$

Where,

y = % of MCF-7s

a = # of positive *PIK3CA* E545K mutant droplets b = # of positive *PIK3CA* E545K WT droplets (a/2) = # of MCF-7 cells

(b-(a/2))/3 = # of WT cells

3) For MCF-7 background *HER2* mutant cells co-cultured with parental MCF-7s. The *HER2* mutant MCF-7s are derived from the *PIK3CA* WT MCF-7s and have 3 WT copies of *PIK3CA* and 1 mutant copy of *HER2* L755S to 1 WT copy. Cellular percentages were calculated using a Dual Mutant assay and equation 3.

$$y = (a/2)/((a/2)+(b))$$

Where, y = % of MCF-7s

a = # of positive *PIK3CA* E545K mutant droplets

b = # of positive *HER2* L755S mutant droplets = # of *HER2* mutant cells (a/2) = # of MCF7 cells
